# Supplementary material for: Binding Site Graphs: A New Graph Theoretical Framework for Prediction of Transcription Factor Binding Sites
Source: PLOS journal article supplement (doi:10.1371/journal.pcbi.0030090), 2007-05-08
Supplement: S1 (10.1371/journal.pcbi.0030090.s001) [file journal.pcbi.0030090.s001]

# Table S1:

|  | PHO4 | CBF1 | TYE7 |
| --- | --- | --- | --- |
| Binding Site Graphs | gCACGTGG | gTCACGTG | cATCACGTGa |
| MacIsaac et al, 2006 | CACGTG | GTCACGTG | tCACGTG |
| Harbison et al, 2004 | CACGTG | CACGTG | tCACGTGa |
